# Supplementary material
Source: Research Square preprint supplement (doi:10.21203/rs.3.rs-7402/v2)
Supplement: Supplementary file 1 [file 249edee6809f51988a84d95d.xlsx]

## Sheet: Table 1
Table 1.Summary of CNVs and CNVRs identified in 32 fine-wool sheep.
	Breeds	Count	Duplication	Deletion	Both	Length (Mb)	Average (kb)	Precentage of chromosome by CNVRs (%)
CNVs	AMS_no	427844	12657	415187	-	1874.08	4.38	-
	AMS_horn	428669	12545	416124	-	1868.48	4.36	-
	CMS_horn	444221	12429	431792	-	1881.06	4.23	-
	AHS_no	446870	12220	434650	-	1883.5	4.21	-
CNVRs	AMS_no	5233	705	4518	10	13.5	2.58	0.52
	AMS_horn	5297	725	4567	5	14.03	2.65	0.54
	CMS_horn	5394	694	4689	11	14.14	2.62	0.55
	AHS_no	5441	698	4735	8	14.39	2.64	0.56
